# Supplementary material for: Hydrophobic Optimization of Functional Poly(TPAE-co-suberoyl chloride) for Extrahepatic mRNA Delivery following Intravenous Administration
Source: MDPI journal article supplement (doi:10.3390/pharmaceutics13111914), 2021-11-12
Supplement: s1 [file s1]

# Supplementary materials: Hydrophobic Optimization of Functional poly (TPAE-co-suberoyl chloride) for Extrahepatic mRNA Delivery Following Intravenous Administration

Xueliang Yu, Shuai Liu, Qiang Cheng, Sang M. Lee, Tuo Wei, Di Zhang, Lukas Farbiak, Lindsay T. Johnson, Xu Wang and Daniel John Siegwart

Table S1. Raw data of in vitro screening of functional polyesters for luciferase mRNA delivery.

|        | PB4K    |         |         |         |      |      |      |      |      |      |        |        |      |       |       |        |         |         |        |        |
|--------|---------|---------|---------|---------|------|------|------|------|------|------|--------|--------|------|-------|-------|--------|---------|---------|--------|--------|
|        | A17     |         |         |         | A3   |      |      |      | A5   |      |        |        | A6   |       |       |        | A21     |         |        |        |
| SC2    | 4695    | 31449   | 21996   | 115198  | 7678 | 523  | 460  | 3264 | 0    | -3   | 36     | 3      | -23  | -3    | -23   | 10     | 43      | 50      | 40     | 66     |
| SC3    | 3917    | 109028  | 283912  | 190542  | 473  | 136  | 270  | 2086 | 3    | -9   | 26     | 236    | -13  | -19   | 10    | 130    | 253     | 226     | 90     | 213    |
| SC4    | 7834    | 162401  | 344494  | 151908  | 280  | 146  | 173  | 8980 | 13   | 36   | 690    | 1937   | 7    | 7     | -6    | -6     | 56      | 606     | 216    | 96     |
| SC5    | 30524   | 709836  | 209496  | 217245  | 113  | 170  | 256  | 3100 | 3    | 50   | 3908   | 1273   | 10   | -19   | -16   | 1323   | 463     | 14937   | 8289   | 20943  |
| SC6    | 1335491 | 1600650 | 506464  | 425000  | 76   | 190  | 170  | 233  | 30   | 1433 | 54837  | 11518  | 13   | 27    | 760   | 69533  | 5796    | 61715   | 111820 | 45095  |
| SC7    | 5347891 | 8567442 | 1814832 | 1056697 | 510  | 100  | 157  | 883  | 46   | 1210 | 90020  | 15157  | 13   | 23    | 15002 | 153478 | 2524    | 15025   | 9141   | 3574   |
| SC8    | 3215210 | 11153   | 426267  | 130468  | 67   | 384  | 2634 | 2270 | 1240 | 2136 | 173859 | 210893 | 523  | 583   | 9948  | 31747  | 17851   | 55574   | 34361  | 93612  |
| SC9    | 197807  | 15071   | 16497   | 13479   | 130  | 273  | 703  | 3701 | 940  | 1376 | 118793 | 248319 | 40   | 7768  | 7207  | 10005  | 1368191 | 1327292 | 664925 | 20353  |
| SC10   | 32118   | 520379  | 209529  | 5128    | 67   | 67   | 80   | 93   | 520  | 9226 | 134075 | 218545 | 2910 | 2437  | 32941 | 10499  | 3559842 | 1686725 | 554024 | 35094  |
| SC11   | 4558    | 13507   | 34362   | 25709   | 260  | 470  | 1180 | 107  | 506  | 863  | 20726  | 239476 | 3054 | 11027 | 6388  | 22724  | 2466850 | 1644258 | 908776 | 233777 |
| SC12   | 1247    | 3170    | 14212   | 96726   | 286  | 66   | 93   | 109  | 413  | 3123 | 5258   | 61047  | 1153 | 620   | 1327  | 4371   | 1132415 | 1180560 | 483729 | 61400  |
| SC14   | 35995   | 522077  | 3311    | 4655    | 316  | 66   | 53   | 116  | 46   | 336  | 9      | 196    | 123  | 1077  | 3197  | 10893  | 1367468 | 646917  | 760790 | 94148  |
| SC16   | 2110055 | 2171115 | 823932  | 314166  | 56   | 1940 | 1583 | 266  | 23   | 79   | 113    | 706    | 323  | 2270  | 1297  | 1683   | 17979   | 1343    | 289    | 299    |
| SC18   | 2400    | 4805    | 337     | 5923    | 886  | 423  | 1519 | 3194 | 10   | 73   | 86     | 396    | 6300 | 7370  | 1917  | 1283   | 8359    | 18458   | 3067   | 303    |
| SC4-1  | 21095   | 7040    | 17037   | 54645   | 146  | 126  | 143  | 113  | 43   | 0    | 393    | 8582   | 0    | 20    | 33    | 100    | 193     | 196     | 199    | 139    |
| SC5-1  | 11170   | 47348   | 149090  | 287449  | 3504 | 1036 | 160  | 470  | 40   | 43   | 2233   | 400    | 23   | 13    | 26    | 7264   | 26      | 130     | 116    | 63     |
| SC8-1  | 5376900 | 2129110 | 2013409 | 892731  | 250  | 346  | 406  | 8015 | 943  | 6737 | 259225 | 4715   | 36   | 4845  | 21542 | 39679  | 180     | 940     | 326    | 126    |
| SC8-Ph | 13551   | 149094  | 332641  | 206320  | 1270 | 1570 | 290  | 1446 | 26   | 753  | 590    | 16     | 63   | 29    | 369   | 723    | 20      | 63      | 3      | 10     |
| SO6    | 78937   | 29810   | 11236   | 8409    | 186  | 286  | 360  | 1016 | 20   | 10   | 33     | 80     | 23   | 10    | 19    | 3274   | 190     | 520     | 6947   | 6666   |
| SO11   | 71844   | 66581   | 11320   | 8305    | 436  | 606  | 1406 | 3717 | 36   | 190  | 296    | 74799  | 40   | 26    | 143   | 956    | 180     | 66      | 80     | 163    |

|        | PB8K   |        |        |       |      |      |      |      |      |       |        |        |       |      |     |     |        |        |      |       |
|--------|--------|--------|--------|-------|------|------|------|------|------|-------|--------|--------|-------|------|-----|-----|--------|--------|------|-------|
|        | A17    |        |        |       | A3   |      |      |      | A5   |       |        |        | A6    |      |     |     | A21    |        |      |       |
| SC2    | 96     | 333    | 213    | 946   | 3    | 10   | 6    | 6    | 40   | 33    | 250    | 3767   | 40    | 23   | 10  | 7   | 3      | 1956   | 2407 | 943   |
| SC3    | 3220   | 2316   | 3834   | 4455  | 13   | 6    | 26   | 10   | 46   | 93    | 533    | 11591  | 83    | 13   | 3   | 17  | 710    | 1750   | 6586 | 1413  |
| SC4    | 2754   | 10229  | 22420  | 15379 | 10   | 19   | 6    | 6    | 83   | 133   | 1986   | 88417  | 17    | 13   | 20  | 13  | 1376   | 986    | 186  | 12280 |
| SC5    | 3941   | 10172  | 30160  | 3277  | 3    | 13   | 6    | 0    | 46   | 533   | 24007  | 177279 | 10    | 7    | 17  | 40  | 1310   | 3550   | 8983 | 1003  |
| SC6    | 8549   | 6336   | 22539  | 1119  | 13   | -3   | 23   | 426  | 133  | 7819  | 157737 | 588267 | 17    | 7    | 20  | 33  | 1206   | 10402  | 3354 | 2874  |
| SC7    | 25888  | 46849  | 11972  | 430   | 10   | 7    | 6    | 0    | 4325 | 5035  | 254553 | 27536  | 6     | 23   | 336 | 589 | 61842  | 30415  | 2580 | 123   |
| SC8    | 14647  | 42109  | 13781  | 197   | -3   | 0    | 6    | 1489 | 540  | 7993  | 24448  | 680    | 36    | 13   | 153 | 53  | 163065 | 9794   | 847  | 227   |
| SC9    | 211244 | 375346 | 10046  | 177   | -10  | -13  | 110  | 0    | 50   | 37    | 540    | 1060   | 23    | 439  | 13  | 3   | 206611 | 284891 | 463  | 77    |
| SC10   | 141031 | 356554 | 3884   | 200   | -6   | 10   | -7   | 29   | 93   | 2387  | 1273   | 463    | 966   | 339  | 36  | 23  | 6473   | 1897   | 157  | 153   |
| SC11   | 62679  | 13962  | 31336  | 327   | 133  | 386  | 13   | -3   | 93   | 243   | 6149   | 4091   | 209   | 769  | 19  | 339 | 414683 | 32692  | 680  | 130   |
| SC12   | 472140 | 600513 | 52541  | 550   | 40   | 6    | 10   | 3    | 67   | 17    | 387    | 1483   | 470   | 207  | 123 | 87  | 1900   | 1256   | 149  | 30    |
| SC14   | 435699 | 458355 | 14660  | 3908  | 3    | -3   | 26   | 23   | 47   | 43    | 190    | 190    | 193   | 330  | 83  | 230 | 16623  | 156    | 746  | 566   |
| SC16   | 269047 | 35597  | 16873  | 1583  | 160  | 33   | 43   | 30   | 37   | 83    | 53     | 30     | 330   | 393  | 47  | 37  | 1103   | 529    | 146  | 93    |
| SC18   | 112550 | 23676  | 235783 | 70221 | 7537 | 5505 | 1203 | 613  | 67   | 17    | 27     | 80     | 10194 | 3707 | 523 | 77  | 49016  | 18447  | 459  | 96    |
| SC4-1  | 6217   | 5575   | 8609   | 10949 | 13   | 3    | 7    | 3    | 30   | 10    | 780    | 28106  | 23    | 7    | 4   | 7   | 36     | 986    | 346  | 369   |
| SC5-1  | 8914   | 5879   | 15085  | 6090  | -3   | 6    | 7    | 1777 | 30   | 1240  | 74992  | 3040   | 47    | 7    | 4   | 70  | 7      | 53     | 133  | 516   |
| SC8-1  | 6510   | 15520  | 22395  | 12959 | 0    | 7    | 680  | 13   | 743  | 3108  | 275006 | 1227   | 77    | 17   | 27  | 64  | 200    | 129    | 86   | 0     |
| SC8-Ph | 2296   | 4231   | 27901  | 83    | 13   | 3    | 10   | 3    | 323  | 29117 | 2983   | 5392   | 7     | 0    | -3  | 10  | 29     | 10     | 13   | -3    |
| SO6    | 426    | 153    | 276    | 330   | 3    | 0    | -6   | 10   | 60   | 267   | 33     | 5095   | 10    | 3    | 13  | 17  | 10     | 16     | 76   | 909   |
| SO11   | 313    | 363    | 263    | 623   | 3    | 10   | 6    | 16   | 447  | 2647  | 1467   | 115639 | 7     | 7    | 3   | 17  | 66     | 39     | 10   | 6     |

|        | PE17K   |        |       |     |      |     |      |      |     |     |       |      |    |     |     |     |     |     |     |    |
|--------|---------|--------|-------|-----|------|-----|------|------|-----|-----|-------|------|----|-----|-----|-----|-----|-----|-----|----|
|        | A17     |        |       |     | A3   |     |      |      | A5  |     |       |      | A6 |     |     |     | A21 |     |     |    |
| SC2    | 43      | 40     | 330   | 120 | 0    | 6   | 0    | 6    | 6   | 29  | 6     | 96   | 6  | 6   | 3   | 13  | 17  | 17  | 20  | 17 |
| SC3    | 2250    | 10786  | 4368  | 73  | 46   | 109 | 0    | 43   | 3   | 3   | 20    | 5863 | 16 | 3   | 6   | 16  | 7   | 23  | 10  | 13 |
| SC4    | 10003   | 47844  | 5098  | 103 | 2727 | 6   | 10   | 146  | 10  | 6   | 7     | 1793 | 56 | 16  | 6   | 9   | 30  | 7   | 20  | 27 |
| SC5    | 107387  | 223981 | 200   | 147 | 70   | 6   | 0    | 226  | 26  | 19  | 2384  | 2110 | 16 | 19  | 7   | 6   | 0   | 17  | 17  | 17 |
| SC6    | 79727   | 215751 | 110   | 100 | 0    | 6   | 20   | 6    | 6   | 123 | 33764 | 36   | 16 | 0   | 0   | 19  | 13  | 27  | 150 | 17 |
| SC7    | 449687  | 163232 | 22475 | 149 | 10   | 207 | 140  | 407  | 13  | 26  | 1020  | 3    | 13 | 13  | 184 | 6   | 6   | 4   | 6   | 4  |
| SC8    | 41459   | 109    | 43    | 83  | 117  | 143 | 237  | 10   | 17  | 333 | 366   | 13   | 0  | 7   | 3   | 0   | 6   | 4   | 7   | 6  |
| SC9    | 109087  | 33456  | 119   | 103 | 147  | 7   | 7    | 23   | 10  | 43  | 290   | 23   | 4  | 17  | 10  | 7   | 7   | 540 | 42  | 6  |
| SC10   | 50      | 56     | 33    | 59  | 23   | 20  | 17   | 80   | 33  | 113 | 330   | 13   | 30 | 4   | 7   | 10  | 0   | 6   | 6   | 7  |
| SC11   | 15557   | 8636   | 43    | 39  | 1080 | 13  | 13   | 43   | 90  | 110 | 410   | 10   | 14 | 30  | 23  | 30  | 150 | 163 | 6   | 20 |
| SC12   | 9884    | 39160  | 63    | 56  | 30   | 10  | 20   | 7    | 3   | 90  | 250   | 93   | 10 | 87  | 53  | 300 | 13  | 30  | 3   | 13 |
| SC14   | 25347   | 31572  | 506   | 109 | 20   | 7   | 17   | 60   | 43  | 117 | 30    | 7    | 20 | 20  | 23  | 10  | 240 | 433 | 153 | 13 |
| SC16   | 32039   | 2043   | 19    | 36  | 53   | 40  | 23   | 33   | 217 | 397 | 14    | 0    | 40 | 140 | 13  | 57  | 60  | 20  | 26  | 10 |
| SC18   | 99      | 49     | 266   | 43  | 73   | 640 | 4334 | 443  | 20  | 7   | 10    | 17   | 7  | 243 | 130 | 160 | 350 | 206 | 20  | 36 |
| SC4-1  | 17875   | 37822  | 4465  | 29  | 703  | 17  | 13   | 13   | 0   | 0   | 1     | 50   | 7  | 37  | 4   | 3   | 3   | 0   | 3   | 7  |
| SC5-1  | 22668   | 75303  | 30726 | 869 | 10   | 3   | 0    | 6    | 7   | 10  | 3971  | 13   | 6  | 0   | 1   | 6   | 27  | 7   | 33  | 17 |
| SC8-1  | 2117225 | 12085  | 416   | 203 | 3    | 40  | 266  | 17   | 7   | 6   | 2737  | 80   | 10 | 6   | 30  | 10  | 13  | 27  | 23  | 7  |
| SC8-Ph | 4067    | 73     | 5376  | 146 | 60   | 90  | 46   | 93   | 6   | 177 | 253   | 0    | 17 | 0   | 14  | 13  | 27  | 17  | 27  | 13 |
| SO6    | 133     | 129    | 776   | 823 | 123  | 70  | 93   | 1336 | 10  | 6   | 6     | 23   | 6  | 7   | 10  | 7   | 10  | 20  | 42  | 10 |
| SO11   | 206     | 179    | 96    | 56  | 40   | 113 | 10   | 27   | 37  | 43  | 37    | 67   | 0  | 10  | 6   | 7   | 6   | 15  | 10  | 15 |

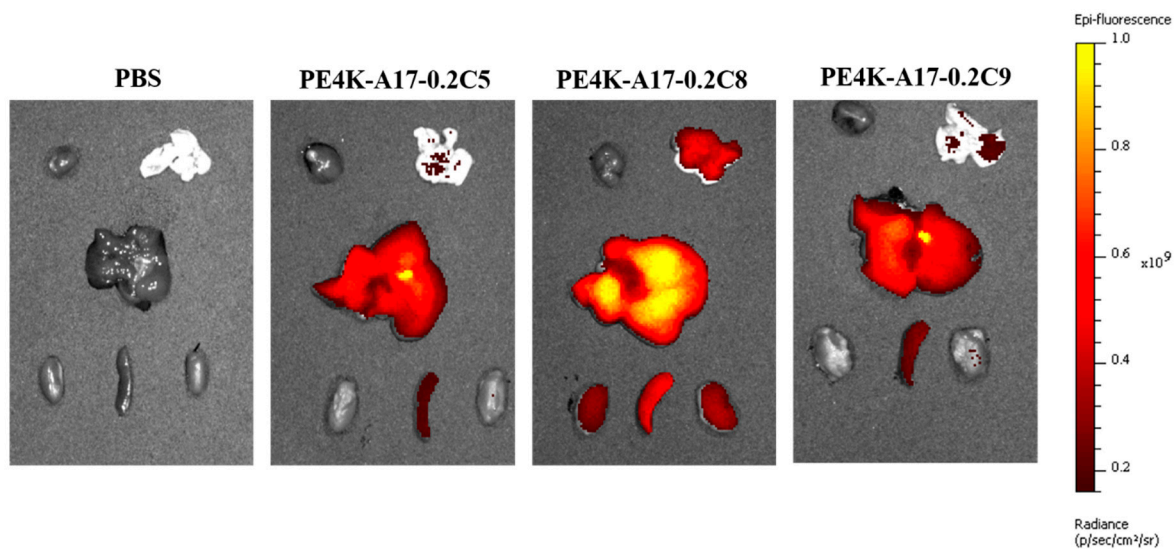

**Figure S1.** Imaging of mice organs after injection of Cy-5 mRNA loaded functional polyesters.

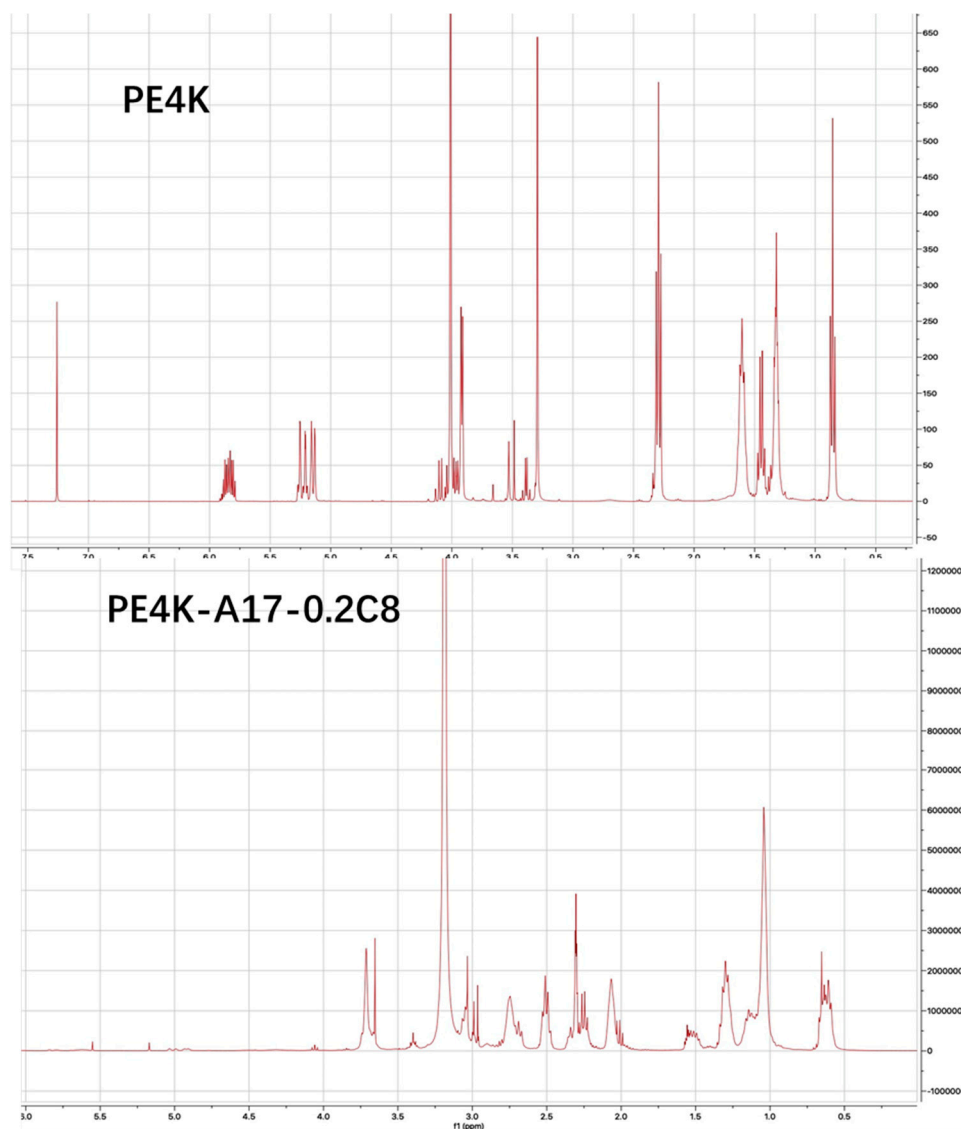

**Figure S2.** Selected NMR of polyester and functional polyester.

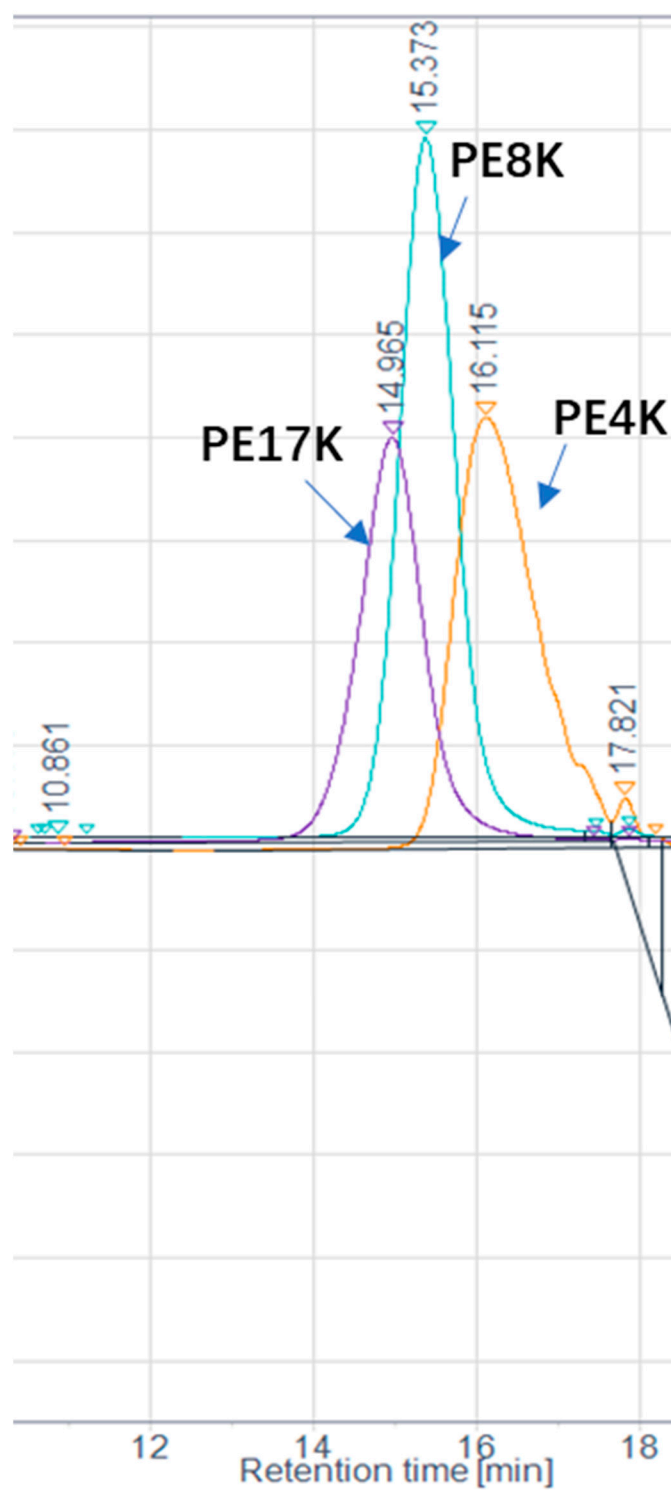

Figure S3. GPC (THF) curves of polyesters.
